# Supplementary material
Source: Springer Nature journal article supplement (https://www.springermedizin.de/resource/supplementary/12886_2013_549_MOESM2_ESM.pdf/9474096)

### Forest plot of hyperopia prevalence by age

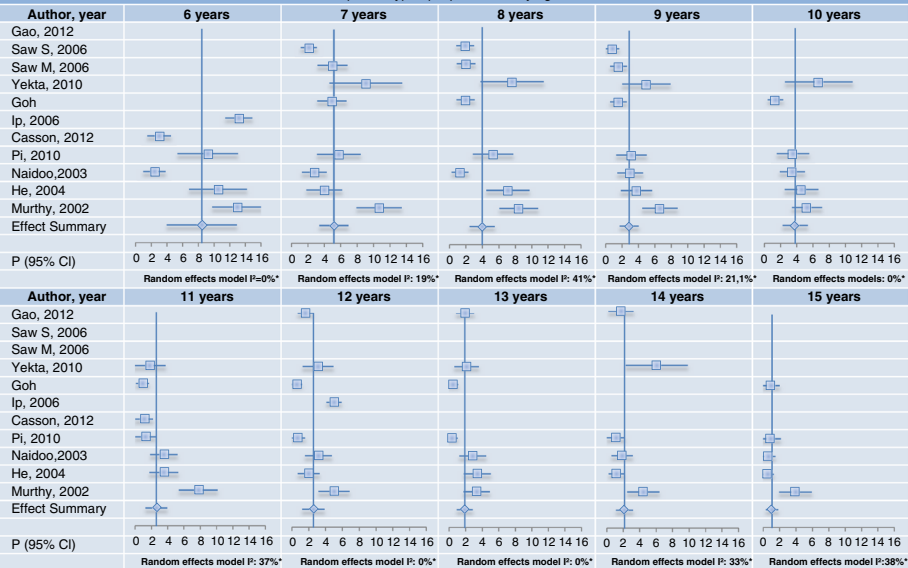

P - Prevalence; CI - Confidence Interval; \*Qtest  $p > 0.1$

Supplement: MOESM2 [file 9474096]
